# Supplementary material for: Linguistic diversity of natural UNESCO world heritage sites: bridging the gap between nature and culture
Source: Springer Nature journal article supplement (doi:10.1007/s10531-017-1340-x), 2017-04-17
Supplement: MOESM1 [file 12225138]

Electronic Supplementary Material

Title: Linguistic Diversity of Natural UNESCO World Heritage Sites: Bridging the Gap between Nature and Culture

Journal: Biodiversity and Conservation

Authors:

Suzanne Romaine (Corresponding Author)

Merton College, University of Oxford

Oxford OX1 4JD

UK

Email: [suzanne.romaine@gmail.com](mailto:suzanne.romaine@gmail.com)

Telephone: +44 1865 276378

L.J. Gorenflo

Dept. of Landscape Architecture

The Pennsylvania State University

University Park, PA 16802-1912

USA

Email: [ljg11@psu.edu](mailto:ljg11@psu.edu)

Telephone: +1 814 863 5337

## Supplementary Material

### Introduction

The supplementary material below comprises a detailed presentation of results from our analyses. It consists of three main components: 1) a tabular summary of overall results (Table S1); 2) a map and detailed tabular presentation of results from Darien and Los Katíos National Parks, depicting some of the complexities in determining language endangerment along national borders (Figure S1 and Table S2); and 3) map and detailed tabular presentations of results from United Nations Educational, Scientific and Cultural Organization (UNESCO) Natural World Heritage Sites (WHSs) that co-occur with 10 indigenous languages or more. The latter section includes three Natural WHSs officially listed by UNESCO as endangered (Selous Game Reserve [Figure S5], Tropical Rainforest Heritage of Sumatra [Figure S7], and Virunga National Park [Figure S8]) as well as four Natural WHSs which the International Union for the Conservation of Nature (IUCN) World Heritage Outlook (Osipova et al. 2014) considers to have “significant concern” (Cliff of Bandiagara (Land of the Dogons) [Figure S2], Lorentz National Park [Figure S4], the Three Parallel Rivers of Yunnan Protected Areas [Figure S6], and Western Ghats [Figure S9]). The Western Ghats map is a duplicate of that in the main body of the paper; we included it to make this supplementary material section stand-alone, rather than require that the reader refer back to the main paper for the map showing the languages listed in the supplementary table for Western Ghats (Table S10).

Table S1 contains results from our analyses for all 238 Natural (including Mixed Cultural-Natural) WHSs. The sites and corresponding languages appear in Figure 1 in the main body of the paper. As in the paper itself, we consider Expanded Graded Intergenerational Disruption Scale (EGIDS), a measure of language endangerment, focusing on the following categories: 6b threatened, 7 shifting, 8a moribund, 8b nearly extinct, and 9 dormant. We also consider estimated number of speakers, identifying languages spoken by 10,000 or fewer and 1,000 or fewer, as endangered. *The Ethnologue* database used for this study assigns EGIDS scores on a country-by-country basis (Lewis et al. 2013). Hence, cross-border languages and languages spoken by widespread diasporic populations may have different EGIDS scores, depending on factors such as size of speech community, presence of other languages, language status, etc. Zulu, for instance, has a score of EGIDS 1 in its primary country, South Africa, where it is spoken by more than 11 million and is one of 11 official languages. In other countries (i.e. Lesotho, Mozambique, Swaziland and Malawi), however, Zulu is a minority language spoken by fewer than a quarter million people total, and is ascribed an EGIDS value of 5. In our analysis Zulu intersects two Natural WHSs: iSimangaliso Wetland Park in South Africa and Maloti-Drakensberg Park, a transboundary site comprising uKhahlamba Drakensberg National Park in South Africa and the Sehlathebe National Park in Lesotho. Zulu is not endangered in either instance on the basis of EGIDS scores (EGIDS 1 in iSimangaliso Wetland Park, EGIDS 5 in Maloti-Drakensberg Park) or speaker numbers (248,000 in Maloti-Drakensberg Park). In other cases, however, where Natural WHSs and languages intersecting them straddle country borders, the situation is not as clear because a language might be *locally endangered*, in the particular WHS it intersects, either by virtue of EGIDS score or small speaker numbers, but not *globally endangered*. Although our main interest here is local endangerment in the context of Natural WHSs, we identified all such instances (N=25) and examined them on a case-by-case basis. Generally, if a language ranked as endangered *in the polygon that intersected a Natural WHS*, based on the EGIDS assessment, number of speakers, or both criteria, we defined it as endangered in our analysis, choosing to err on the side of being conservative with respect to potential language loss. Such

**Table S1. Natural WHSs and Statistics on Indigenous Languages that Intersect Them**

| Natural WHS Site <sup>a</sup>                                               | Total Languages | EGIDS Languages <sup>b,c</sup> | Languages ≤ 10K Speakers <sup>c</sup> | Languages ≤ 1K Speakers <sup>c</sup> |
|-----------------------------------------------------------------------------|-----------------|--------------------------------|---------------------------------------|--------------------------------------|
| <b>Air and Ténére Natural Reserves</b>                                      | 2               | 1                              | -                                     | -                                    |
| Aldabra Atoll                                                               | 1               | -                              | -                                     | -                                    |
| Alejandro de Humboldt National Park                                         | -               | -                              | -                                     | -                                    |
| Ancient Maya City and Protected Tropical Forests of Calakmul, Campeche      | 1               | -                              | -                                     | -                                    |
| Archipiélago de Revillagigedo                                               | -               | -                              | -                                     | -                                    |
| Area de Conservación Guanacaste                                             | -               | -                              | -                                     | -                                    |
| Atlantic Forest Southeast Reserves                                          | 1               | -                              | 1                                     | -                                    |
| Australian Fossil Mammal Sites (Riversleigh, Naracoorte)                    | -               | -                              | -                                     | -                                    |
| Banc d'Arguin National Park                                                 | 1               | -                              | -                                     | -                                    |
| <b>Belize Barrier Reef Reserve System</b>                                   | 1               | -                              | -                                     | -                                    |
| Białowieża Forest                                                           | 2               | -                              | -                                     | -                                    |
| Blue and John Crow Mountains                                                | 1               | -                              | -                                     | -                                    |
| Brazilian Atlantic Islands: Fernando de Noronha and Atol das Rocas Reserves | -               | -                              | -                                     | -                                    |
| Bwindi Impenetrable National Park                                           | 2               | -                              | -                                     | -                                    |
| Canadian Rocky Mountain Parks                                               | 1               | 1                              | 1                                     | -                                    |
| Canaima National Park                                                       | 4               | 4                              | 4                                     | 3                                    |
| Cape Floral Region Protected Areas                                          | 1               | -                              | -                                     | -                                    |
| Carlsbad Caverns National Park                                              | -               | -                              | -                                     | -                                    |
| Caves of Aggtelek Karst and Slovak Karst                                    | 2               | -                              | -                                     | -                                    |
| Central Amazon Conservation Complex                                         | 1               | -                              | -                                     | -                                    |
| Central Highlands of Sri Lanka                                              | 2               | -                              | -                                     | -                                    |
| Central Sikhote-Alin                                                        | -               | -                              | -                                     | -                                    |
| Central Suriname Nature Reserve                                             | 1               | -                              | -                                     | -                                    |
| Cerrado Protected Areas: Chapada dos Vaadeiros and Emas National Parks      | -               | -                              | -                                     | -                                    |
| Chengjiang Fossil Site                                                      | 1               | -                              | -                                     | -                                    |
| China Danxia                                                                | 6               | -                              | -                                     | -                                    |
| Chitwan National Park                                                       | 6               | 2                              | 1                                     | -                                    |
| Cliff of Bandiagara (Land of the Dogons)                                    | 12              | 1                              | 4                                     | 1                                    |
| Cocos Island National Park                                                  | -               | -                              | -                                     | -                                    |
| Coiba National Park and its Special Zone of Marine Protection               | -               | -                              | -                                     | -                                    |
| <b>Comoé National Park</b>                                                  | 7               | -                              | 2                                     | -                                    |
| Danube Delta                                                                | 1               | -                              | -                                     | -                                    |
| Darien National Park                                                        | 5               | 1                              | 3                                     | 2                                    |
| Desembarco del Granma National Park                                         | -               | -                              | -                                     | -                                    |
| Dinosaur Provincial Park                                                    | -               | -                              | -                                     | -                                    |
| Discovery Coast Atlantic Forest Reserves                                    | -               | -                              | -                                     | -                                    |
| Dja Faunal Reserve                                                          | 3               | -                              | -                                     | -                                    |
| Djoudj National Bird Sanctuary                                              | 2               | -                              | -                                     | -                                    |
| Doñana National Park                                                        | 1               | -                              | -                                     | -                                    |
| Dong Phayayen-Khao Yai Forest Complex                                       | 5               | -                              | -                                     | -                                    |
| Dorset and East Devon Coast                                                 | 1               | -                              | -                                     | -                                    |
| Durmitor National Park                                                      | 2               | -                              | -                                     | -                                    |
| <b>East Rennell</b>                                                         | 1               | -                              | 1                                     | -                                    |
| Ecosystem and Relict Cultural Landscape of Lopé-Okanda                      | 2               | 1                              | 1                                     | 1                                    |
| El Pinacate and Gran Desierto de Altar Biosphere Reserve                    | -               | -                              | -                                     | -                                    |
| Ennedi Massif: Natural and Cultural Landscape                               | 2               | -                              | -                                     | -                                    |
| <b>Everglades National Park</b>                                             | -               | -                              | -                                     | -                                    |
| Fraser Island                                                               | -               | -                              | -                                     | -                                    |

|                                                                      |    |    |    |   |
|----------------------------------------------------------------------|----|----|----|---|
| Galápagos Islands                                                    | -  | -  | -  | - |
| Garanjonay National Park                                             | 1  | -  | -  | - |
| <b>Garamba National Park</b>                                         | 5  | 1  | 2  | 1 |
| Giant's Causeway and Causeway Coast                                  | 1  | -  | -  | - |
| Golden Mountains of Altai                                            | 3  | 1  | -  | - |
| Gondwana Rainforests of Australia                                    | 1  | 1  | 1  | 1 |
| Göreme National Park and the Rock Sites of Cappadocia                | 1  | -  | -  | - |
| Gough and Inaccessible Islands                                       | -  | -  | -  | - |
| Grand Canyon National Park                                           | 2  | 2  | 1  | - |
| Great Barrier Reef                                                   | 8  | 8  | 8  | 8 |
| Great Himalayan National Park Conservation Area                      | 5  | -  | 1  | 1 |
| Great Smoky Mountains National Park                                  | 1  | 1  | -  | - |
| Greater Blue Mountains Area                                          | -  | -  | -  | - |
| Gros Morne National Park                                             | -  | -  | -  | - |
| Gulf of Porto: Calanche of Piana, Gulf of Girolata, Scandola Reserve | 2  | -  | -  | - |
| Gunung Mulu National Park                                            | 1  | 1  | 1  | - |
| Ha Long Bay                                                          | 1  | -  | -  | - |
| Hawaii Volcanoes National Park                                       | 2  | -  | 1  | - |
| Heard and McDonald Islands                                           | -  | -  | -  | - |
| Henderson Island                                                     | -  | -  | -  | - |
| Hierapolis-Pamukkale                                                 | 1  | -  | -  | - |
| High Coast/Kvarken Archipelago                                       | 2  | -  | -  | - |
| Historic Sanctuary of Machu Picchu                                   | 1  | -  | -  | - |
| Huanglong Scenic and Historic Interest Area                          | 2  | 1  | 1  | - |
| Huascarán National Park                                              | 4  | 1  | 1  | - |
| Hubei Shennongjia                                                    | 1  | -  | -  | - |
| Ibiza, Biodiversity and Culture                                      | 2  | -  | -  | - |
| Ichkeul National Park                                                | 1  | -  | -  | - |
| Iguaçu National Park                                                 | 1  | 1  | 1  | - |
| Iguazu National Park                                                 | 1  | 1  | 1  | - |
| Ilulissat Icefjord                                                   | 1  | -  | -  | - |
| Ischigualasto/Talampaya Natural Parks                                | -  | -  | -  | - |
| iSimangaliso Wetland Park                                            | 2  | -  | 1  | 1 |
| Islands and Protected Areas of the Gulf of California                | 4  | 1  | 2  | 2 |
| Isole Eolie (Aeolian Islands)                                        | 1  | -  | -  | - |
| Jeju Volcanic Island and Lava Tubes                                  | 1  | -  | -  | - |
| Jiuzhaigou Valley Scenic and Historic Interest Area                  | 1  | 1  | 1  | - |
| Joggins Fossil Cliffs                                                | -  | -  | -  | - |
| <b>Kahuzi-Biega National Park</b>                                    | 5  | -  | 1  | - |
| Kakadu National Park                                                 | 5  | 5  | 5  | 4 |
| Kaziranga National Park                                              | 3  | -  | -  | - |
| Kenya Lake System in the Great Rift Valley                           | 4  | 1  | -  | - |
| Keoladeo National Park                                               | 2  | -  | -  | - |
| Khangchendzonga National Park                                        | 4  | 1  | -  | - |
| Kilimanjaro National Park                                            | 4  | -  | -  | 1 |
| Kinabalu Park                                                        | 2  | 2  | 1  | 1 |
| Kluane / Wrangell-St. Elias/Glacier Bay / Tatshenshini-Alsek         | 3  | 3  | 3  | 3 |
| Komodo National Park                                                 | 3  | 1  | 1  | 1 |
| Lagoons of New Caledonia: Reef Diversity and Associated Ecosystems   | 15 | 13 | 15 | 6 |
| Lake Baikal                                                          | 2  | 1  | 1  | - |
| Lake Malawi                                                          | 1  | -  | -  | - |

|                                                                      |    |   |   |   |
|----------------------------------------------------------------------|----|---|---|---|
| Lake Turkana National Parks                                          | 1  | - | - | - |
| Lakes of Ounianga                                                    | 1  | - | - | - |
| Laponian Area                                                        | 2  | - | - | - |
| Laurisilva of Madeira                                                | 1  | - | - | - |
| Lena Pillars Nature Park                                             | 2  | 1 | 1 | - |
| Lord Howe Island Group                                               | -  | - | - | - |
| Lorentz National Park                                                | 12 | 2 | 7 | 3 |
| Los Glaciares National Park                                          | -  | - | - | - |
| Los Katfos National Park                                             | 2  | 1 | 2 | 1 |
| Lut Desert                                                           | 2  | - | - | - |
| Macquarie Island                                                     | -  | - | - | - |
| Maloti-Drakensberg Park                                              | 3  | - | - | - |
| Malpelo Fauna and Flora Sanctuary                                    | -  | - | - | - |
| Mammoth Cave National Park                                           | -  | - | - | - |
| Mana Pools National Park, Sapi and<br>Chewore Safari Areas           | 2  | - | - | - |
| Manas Wildlife Sanctuary                                             | 3  | - | - | - |
| <b>Manovo-Gounda St. Floris National Park</b>                        | 5  | - | 1 | - |
| Manú National Park                                                   | 4  | 2 | 3 | 2 |
| Messel Pit Fossil Site                                               | 1  | - | - | - |
| Meteora                                                              | 2  | 1 | - | - |
| Miguasha National Park                                               | -  | - | - | - |
| Mistaken Point                                                       | -  | - | - | - |
| Monarch Butterfly Biosphere Reserve                                  | 3  | - | - | - |
| Monte San Giorgio                                                    | 2  | - | - | - |
| Morne Trois Pitons National Park                                     | 1  | - | - | - |
| Mosi-oa-Tunya / Victoria Falls                                       | 2  | - | - | - |
| Mount Athos                                                          | 1  | - | - | - |
| Mount Emei Scenic Area, including Leshan<br>Giant Buddha Scenic Area | 1  | - | - | - |
| Mount Etna                                                           | 1  | - | - | - |
| Mount Hamiguitan Range Wildlife<br>Sanctuary                         | 2  | - | - | - |
| Mount Huangshan                                                      | 2  | - | - | - |
| Mount Kenya National Park/Natural Forest                             | 5  | - | - | - |
| <b>Mount Nimba Strict Nature Reserve</b>                             | 3  | - | - | - |
| Mount Sanqingshan National Park                                      | 1  | - | - | - |
| Mount Taishan                                                        | 1  | - | - | - |
| Mount Wuyi                                                           | 2  | - | - | - |
| Nahanni National Park                                                | -  | - | - | - |
| Namib Sand Sea                                                       | -  | - | - | - |
| Nanda Devi and Valley of Flowers National<br>Park                    | 3  | - | 1 | - |
| Natural and Cultural Heritage of the Ohrid<br>Region                 | 4  | - | 1 | - |
| Natural System of Wrangel Island Reserve                             | -  | - | - | - |
| New Zealand Sub-Antarctic Islands                                    | -  | - | - | - |
| Ngorogoro Conservation Area                                          | 4  | 1 | 1 | 1 |
| Ningaloo Coast                                                       | 1  | 1 | 1 | 1 |
| <b>Niokolo-Koba National Park</b>                                    | 4  | 1 | 1 | - |
| Noel Kempff Mercado National Park                                    | -  | - | - | - |
| Ogasawara Islands                                                    | 1  | - | - | - |
| <b>Okapi Wildlife Reserve</b>                                        | 7  | - | - | - |
| Okavango Delta                                                       | 7  | 1 | 3 | 1 |
| Olympic National Park                                                | 1  | 1 | 1 | 1 |
| Pantanal Conservation Complex                                        | 1  | 1 | 1 | 1 |
| Papahānaumokuākea                                                    | -  | - | - | - |
| Península Valdés                                                     | -  | - | - | - |

|                                                                                       |    |   |   |   |
|---------------------------------------------------------------------------------------|----|---|---|---|
| Phoenix Islands Protected Area                                                        | 1  | - | - | - |
| Phong Nha-Ke Bang National Park                                                       | 6  | 2 | 3 | 1 |
| Pirin National Park                                                                   | 2  | - | 1 | - |
| Pitons Management Area                                                                | 1  | - | - | - |
| Pitons, cirques and remparts of Reunion Island                                        | 1  | - | - | - |
| Pitvice Lakes National Park                                                           | 1  | - | - | - |
| Primeval Beech Forests of the Carpathians and the Ancient Beech Forests of Germany    | 5  | - | - | - |
| Puerto-Princesa Subterranean River National Park                                      | 2  | 1 | 2 | 1 |
| Purnululu National Park                                                               | 2  | 2 | 2 | 2 |
| Putorana Plateau                                                                      | -  | - | - | - |
| Pyrénées-Mont Perdu                                                                   | 4  | 2 | 1 | - |
| <b>Rainforests of the Atsinanana</b>                                                  | 6  | - | - | - |
| Redwood National and State Parks                                                      | -  | - | - | - |
| Río Abiseo National Park                                                              | -  | - | - | - |
| <b>Río Plátano Biosphere Reserve</b>                                                  | 4  | 1 | 2 | 2 |
| Rock Islands Southern Lagoon                                                          | 1  | - | - | - |
| Rwenzori Mountains National Park                                                      | 1  | - | - | - |
| Sagamartha National Park                                                              | 2  | - | - | - |
| <b>Salonga National Park</b>                                                          | 4  | - | 2 | - |
| Sanganeb Marine National Park and Dungonab Bay – Mukkawar Island Marine National Park | 1  | - | - | - |
| Sangay National Park                                                                  | 4  | 1 | - | - |
| Sangha Trinational                                                                    | 4  | - | 1 | - |
| Saryarka – Steppe and Lakes of Northern Kazakhstan                                    | 1  | - | - | - |
| <b>Selous Game Reserve</b>                                                            | 12 | 4 | 1 | 1 |
| Serengeti National Park                                                               | 5  | - | - | - |
| Shark Bay, Western Australia                                                          | 1  | 1 | 1 | 1 |
| Shirakami-Sanchi                                                                      | 1  | - | - | - |
| Shiretoko                                                                             | 1  | - | - | - |
| Sian Ka'an                                                                            | 1  | - | - | - |
| Sichuan Giant Panda Sanctuaries – Wolong, Mt. Siguniang and Jiayin Mountains          | 4  | 2 | 1 | - |
| <b>Simien National Park</b>                                                           | 1  | - | - | - |
| Sinharaja Forest Reserve                                                              | 1  | - | - | - |
| Škocjan Caves                                                                         | 1  | - | - | - |
| Socotra Archipelago                                                                   | 1  | 1 | - | - |
| South China Karst                                                                     | 9  | 4 | - | - |
| Srebarna Nature Reserve                                                               | 1  | - | - | - |
| St. Kilda                                                                             | -  | - | - | - |
| Stevns Klint                                                                          | 1  | - | - | - |
| Sundarbans National Park                                                              | 1  | - | - | - |
| Surtsey                                                                               | 1  | - | - | - |
| Swiss Alps Jungfrau-Aletsch                                                           | 1  | - | - | - |
| Swiss Tectonic Arena Sardona                                                          | 2  | - | - | - |
| Tai National Park                                                                     | 3  | - | 1 | - |
| Tajik National Park (Mountains of the Pamirs)                                         | 4  | 1 | 1 | - |
| Talamanca Range – La Amistad Reserves/La Amistad National Park                        | 4  | - | 3 | - |
| Tasmanian Wilderness                                                                  | -  | - | - | - |
| Tassili n'Ajjer                                                                       | 2  | 1 | - | - |
| Te Wahipounamu – South West New Zealand                                               | -  | - | - | - |
| Teide National Park                                                                   | 1  | - | - | - |

|                                                        |    |   |   |   |
|--------------------------------------------------------|----|---|---|---|
| The Ahwar of Southern Iraq                             | 2  | - | - | - |
| The Dolomites                                          | 4  | 1 | - | - |
| The Sundarbans                                         | 1  | - | - | - |
| The Wadden Sea                                         | 6  | 1 | 1 | - |
| Three Parallel Rivers of Yunnan Protected Areas        | 15 | 3 | 3 | 1 |
| Thungyai – Huai Kha Khaeng Wildlife Sanctuaries        | 5  | 1 | - | - |
| Tikal National Park                                    | -  | - | - | - |
| Tongariro National Park                                | 1  | - | - | - |
| Trang An Landscape Complex                             | 1  | - | - | - |
| <b>Tropical Rainforest Heritage of Sumatra</b>         | 16 | 3 | - | - |
| Tsingy de Bemaraha Strict Nature Reserve               | 1  | - | - | - |
| Tubbataha Reefs Natural Park                           | -  | - | - | - |
| Ujung Kulon National Park                              | 1  | - | - | - |
| Uluru-Kata Tjuta National Park                         | 1  | - | 1 | - |
| Uvs Nuur Basin                                         | 3  | 1 | - | - |
| Vallée de Mai Nature Reserve                           | 1  | - | - | - |
| Virgin Komi Forests                                    | -  | - | - | - |
| <b>Virunga National Park</b>                           | 10 | 2 | 3 | - |
| Volcanoes of Kamchatka                                 | 1  | 1 | 1 | - |
| Vredefort Dome                                         | 2  | - | - | - |
| W. National Park of Niger                              | 3  | - | - | - |
| Wadi Al-Hitan (Whale Valley)                           | 2  | - | - | - |
| Wadi Rum Protected Area                                | 2  | - | - | - |
| Waterton Glacier International Peace Park              | 1  | 1 | 1 | 1 |
| West Norwegian Fjords – Geirangerfjord and Nærøysfjord | 1  | - | - | - |
| Western Caucasus                                       | 2  | - | - | - |
| Western Ghats                                          | 24 | 4 | 9 | 2 |
| Western Tien-Shan                                      | 3  | - | - | - |
| Wet Tropics of Queensland                              | 5  | 5 | 5 | 5 |
| Whale Sanctuary of El Vizcaino                         | -  | - | - | - |
| Willandra Lakes Region                                 | -  | - | - | - |
| Wood Buffalo National Park                             | -  | - | - | - |
| Wulingyuan Scenic and Historic Interest Area           | 1  | - | - | - |
| Xinjiang Tianshan                                      | 4  | 1 | - | - |
| Yakushima                                              | 1  | - | - | - |
| Yellowstone National Park                              | -  | - | - | - |
| Yosemite National Park                                 | -  | - | - | - |

Notes: a—Endangered Natural WHS shown in **bold**; b—EGIDS values for endangerment consist of 6b (“threatened”), 7 (“shifting”), 8a (“moribund”), and 8b (“nearly extinct”); c—for language endangerment, assessment based on EGIDS assessment and number of speakers for the language polygons occurring in a particular nation and intersecting the Natural WHS in question, and assessed on a case-by-case basis where other occurrences of the same language indicate that it is not globally endangered; “-“ equals 0.

cases often involve small cross-border tribal and/or indigenous peoples, whose most recent population numbers or status is uncertain.

Figure S1 presents a map showing languages that intersect the Darien National Park and Los Katíos National Park WHSs on the Panama-Columbia border as an example of the challenges in assessing endangerment. Table S2 contains corresponding tabular data for those same languages. Although these two adjacent parks do not formally constitute one of UNESCO’s fifteen transboundary Natural WHSs, they occupy almost 50 kilometers of shared border and are both part of a larger regional biodiversity complex, Chocó-Darién, part of the Chocó-Darién-Magdalena Biodiversity Hotspot (Mittermeier et al. 2005; World Wide Fund for Nature-Colombia 2014). Darien National Park, Panama’s single most

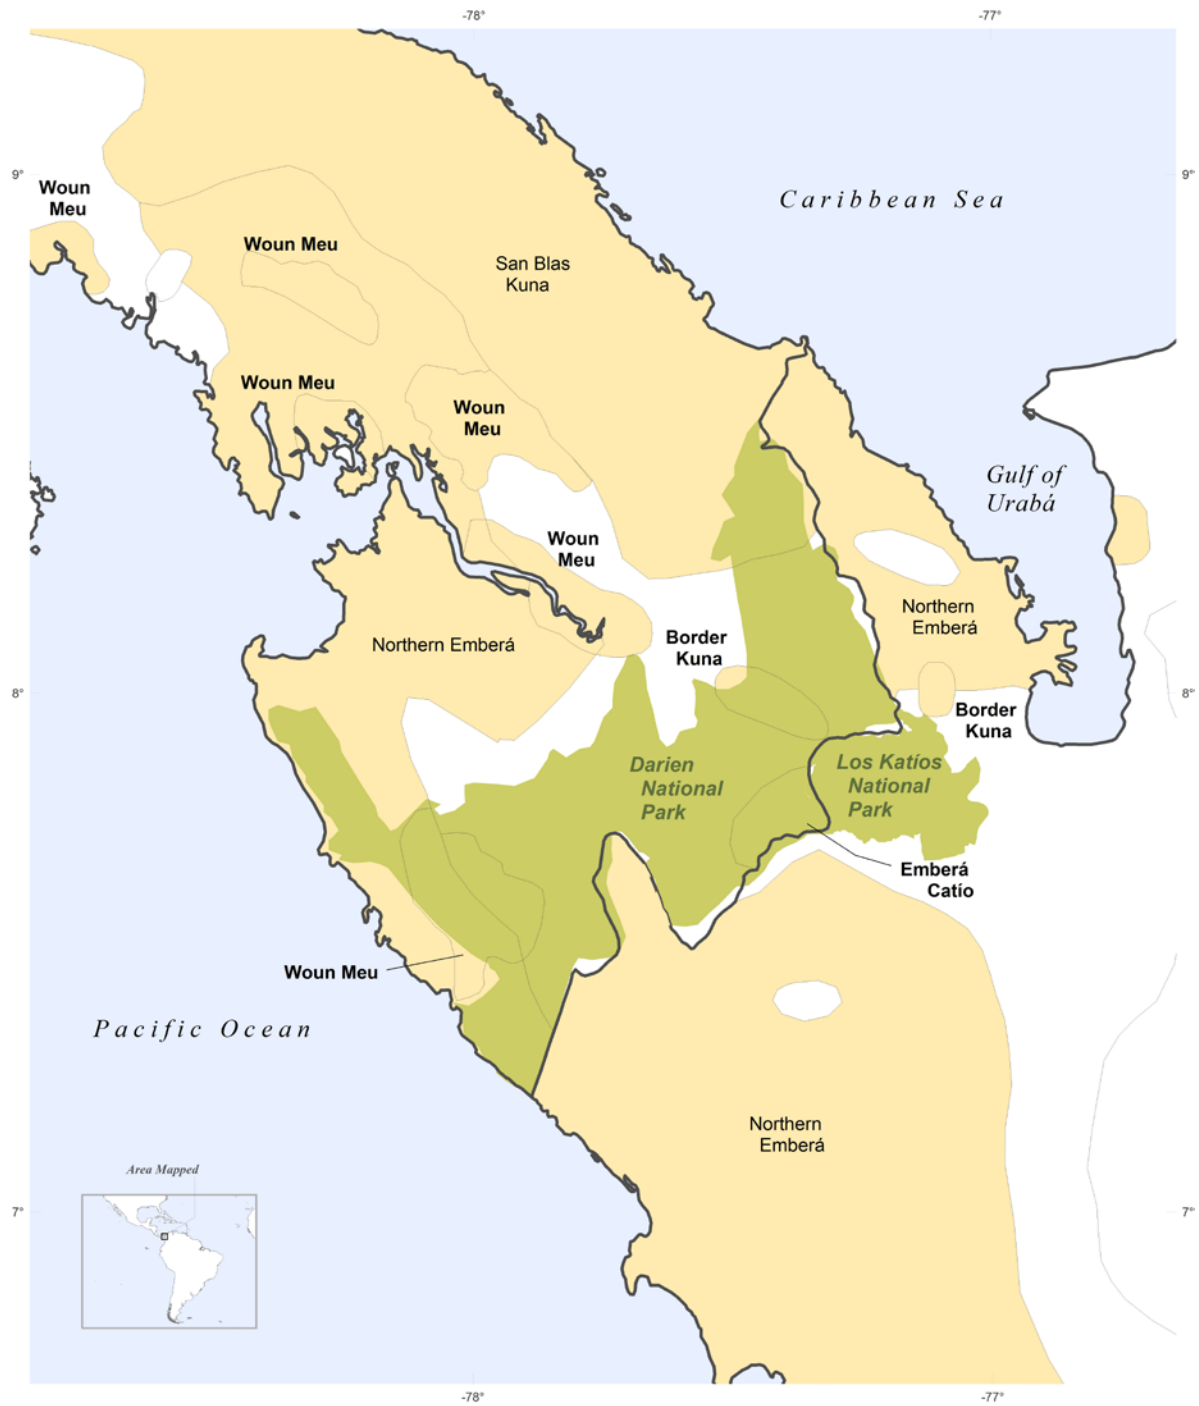

**Languages Intersecting Darien NP and Los Katíos NP WHSs**

Data Sources: Global Mapping International 2015  
 Languages: Global Mapping International 2015  
 Natural WHSs: IUCN and UNEP-WCMC 2016

Projection: Sinusoidal  
 Central Meridian: -77.7°

Defined Indigenous Languages Intersecting Subject WHSs  
 Undefined or Non-Indigenous Languages, or Indigenous Languages Not Intersecting Subject WHSs  
 Natural WHS  
 Languages with Number of Speakers ≤ 10,000, or meeting EGIDS criteria for endangerment, in bold  
 Note: Only languages intersecting subject WHSs are defined

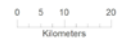

**Figure S.1. Map of indigenous languages intersecting Darien National Park and Los Katíos National Park WHSs**



**Table S2. Indigenous Languages Intersecting or Adjacent to WHSs Darien National Park and Los Katíos National Park WHSs, along with Occurrences of Some of Those Same Languages in Colombia**

| Language (Country)                      | EGIDS Assessment | Estimated Number of Speakers |
|-----------------------------------------|------------------|------------------------------|
| Border Kuna (Colombia) <sup>a</sup>     | 5                | 2,600                        |
| Border Kuna (Panama) <sup>b</sup>       | 5                | 900                          |
| Emberá-Catío (Colombia) <sup>c</sup>    | 6a               | 15,000                       |
| Emberá-Catío (Panama) <sup>b, d</sup>   | 6b               | 40                           |
| Northern Emberá (Colombia) <sup>e</sup> | 5                | 49,700                       |
| Northern Emberá (Panama) <sup>b</sup>   | 5                | 22,500                       |
| San Blas Kuna (Panama) <sup>b</sup>     | 5                | 57,100                       |
| Woun Meu (Colombia) <sup>c</sup>        | 5                | 4,000                        |
| Woun Meu (Panama) <sup>b</sup>          | 5                | 6,800                        |

Notes: a—Intersects Los Katíos (Colombia) National Park; b—intersects Darien (Panama) National Park; c—occurs elsewhere in Colombia; d—adjacent to Los Katíos National Park; e: adjacent to Darien National Park

extensive national park, extends along 90% of the Panama-Colombia border. Table S2 lists the five languages currently spoken by the three indigenous groups (Kuna, Emberá-Katío and Wounaan), whose traditional territories overlap the area occupied by the two Natural WHSs. The only language not present in both countries is San Blas Kuna, which has the largest number of speakers. Because most Kuna migrated long ago to Panama from their original territory along the Gulf of Urabá, Colombia, today only a few small settlements comprising several thousand people remain in Colombia. The separation of San Blas Kuna from the remaining Colombian Kuna and another group of several thousand Kuna residing in scattered settlements in the Darién jungle on the Panama side of the border has led to linguistic differences substantial enough for *Ethnologue* to recognize two Kuna languages shown in Table S2: San Blas Kuna and Border Kuna.

The Emberá people are also dispersed geographically, residing in territories ranging from Eastern Panama to Colombia and through Western Colombia to the northern border of Ecuador. Table S2 includes two of the six Emberá languages recognized as distinct by *Ethnologue*: Northern Emberá and Emberá-Catío, both of which intersect Darien National Park. The largest number of speakers of both languages, however, are located in Columbia outside the area of Los Katíos National Park. The Wounaan people speak Woun Meu, a related but distinct language to Emberá, which also intersects Darien National Park, but another group of Woun Meu speakers is located in Columbia outside the area of Los Katíos National Park.

In the case of Los Katíos National Park in Colombia, Table S2 shows that neither of the two indigenous languages intersecting the reserve, Border Kuna and Emberá-Catío, has an EGIDS rating that would indicate endangered status, but the former has fewer than 10,000 speakers. However, Emberá-Catío also has an even smaller group of 40 speakers in *Panama*, within the area of Darien National Park. *Ethnologue* assigns this occurrence of Emberá-Catío an EGIDSs score of 6b, indicating the language is threatened in Panama. Another occurrence of Emberá-Catío is found further south in Colombia, but has 15,000 speakers, and a 6a EGIDS rating, both above our thresholds of endangerment. Were we to consider all occurrences for all languages, Emberá-Catío would not meet criteria for endangerment under EGIDS or total speakers. Due to the difficult circumstances along the Colombia-Panama border, we decided to categorize all languages that intersect Los Katíos at the level of endangerment indicated in those intersecting polygons, regardless of global values. We debated the inclusion of the Panamanian occurrence of Emberá-Catío for a Colombian park, but ultimately decided that the fluid border and level of threat experienced by indigenous peoples in this area justified a decision to associate it with the park. In addition, *Ethnologue* population estimates for Emberá-Catío date from 1982 (Panama) and 1992 (Colombia), and almost certainly do not reflect current threats in this impoverished and remote region of dense mountainous jungle and swamps. Absence of government control has left these numerous small

indigenous communities vulnerable, with many forcibly resettled elsewhere or displaced by decades of internal armed conflict, civil war, and clashes with mestizo in-migrants and settlers whose farming and ranching have caused large-scale deforestation. In 2009 Colombia made a rare proactive request to the World Heritage Committee for inscription of Los Katíos National Park on the list of endangered WHSs due to the operation of guerilla and paramilitary groups, drug smugglers, illegal loggers, fishers and hunters. Although the park was removed from the endangered list in 2015 (UNESCO 2015), IUCN's World Heritage Outlook still considers this site (as well as neighboring Darien National Park) to be of "significant concern" (Osipova et al. 2014). The possible completion of the final segment of the Pan-American Highway through the Darien Gap, passing through both parks and some thirty communities, still poses a major threat, as do proposals being considered by the governments of Panama and Colombia for megadevelopment projects (e.g., gas pipelines, roads, ports, hydroelectric dams) that could further damage the communities and ecology of both WHSs (Bermúdez and Robertson 2011, Suman 2007, World Wide Fund for Nature-Colombia 2014).

In the case of Darien National Park in Panama, Table S2 indicates five indigenous languages that intersect the reserve—Border Kuna, Emberá-Catío, Northern Emberá, San Blas Kuna, and Woun Meu. With the exception of San Blas Kuna, all of those occur elsewhere in Panama. Levels of endangerment vary. For instance, Woun Meu has an EGIDS ranking of 5 everywhere it occurs, including where it intersects Darien National Park. However, the number of total speakers is 10,800 for both countries, though only 6,800 for the portion in Panama. Consistent with our conservative treatment of Los Katíos, we categorized Woun Meu as having fewer than 10,000 speakers in Table S1 because the polygon that intersected the park met this criterion. Our examination of these two sites shows that even within countries, a language may encompass numerous smaller speech communities with different and often continually changing sociolinguistic dynamics. In such situations, ultimately a desk-based analysis is not an adequate substitute for on-the-ground fieldwork and regular monitoring.

Figure S2 presents a map showing languages that intersect the Cliff of Bandiagara (Land of the Dogons) Natural WHS. Table S3 contains corresponding tabular data for those same languages.

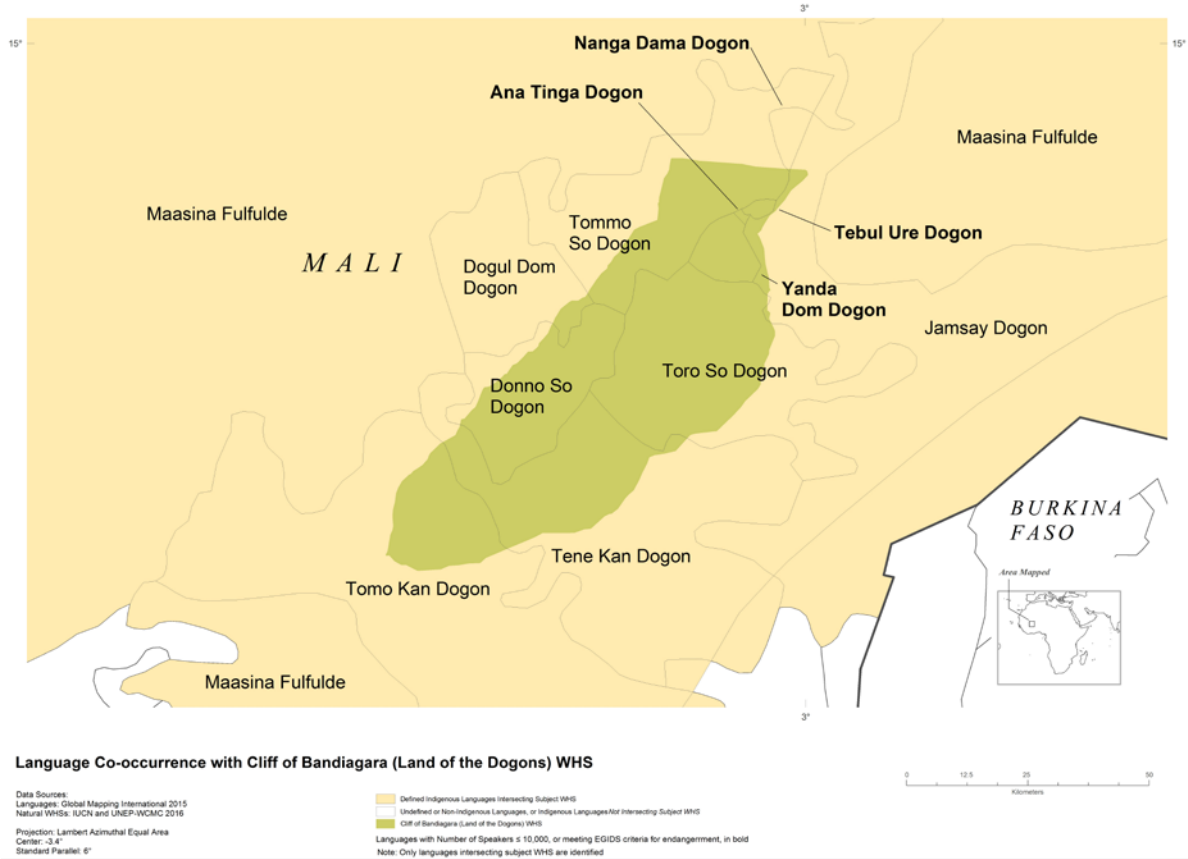

**Figure S.2. Map of indigenous languages intersecting Cliff of Bandiagara (Land of the Dogons) WHS**

**Table S3. Indigenous Languages Intersecting Cliff of Bandiagara (Land of Dogons) WHS**

| Language         | EGIDS Assessment | Estimated Number of Speakers |
|------------------|------------------|------------------------------|
| Ana Tinga Dogon  | 6b               | 500                          |
| Dogul Dom Dogon  | 6a               | 15,700                       |
| Donno So Dogon   | 5                | 45,300                       |
| Jamsay Dogon     | 6a               | 130,000                      |
| Maasina Fulfulde | 4                | 1,000,000                    |
| Nanga Dama Dogon | 6a               | 3,000                        |
| Tebul Ure Dogon  | 6a               | 3,000                        |
| Tene Kan Dogon   | 6a               | 127,000                      |
| Tommo So Dogon   | 6a               | 60,000                       |
| Tomo Kan Dogon   | 6a               | 133,000                      |
| Toro So Dogon    | 4                | 50,000                       |
| Yanda Dom Dogon  | 6a               | 2,000                        |

Figure S3 presents a map showing languages that intersect the Lagoons of New Caledonia Natural WHS. Table S4 contains corresponding tabular data for those same languages.

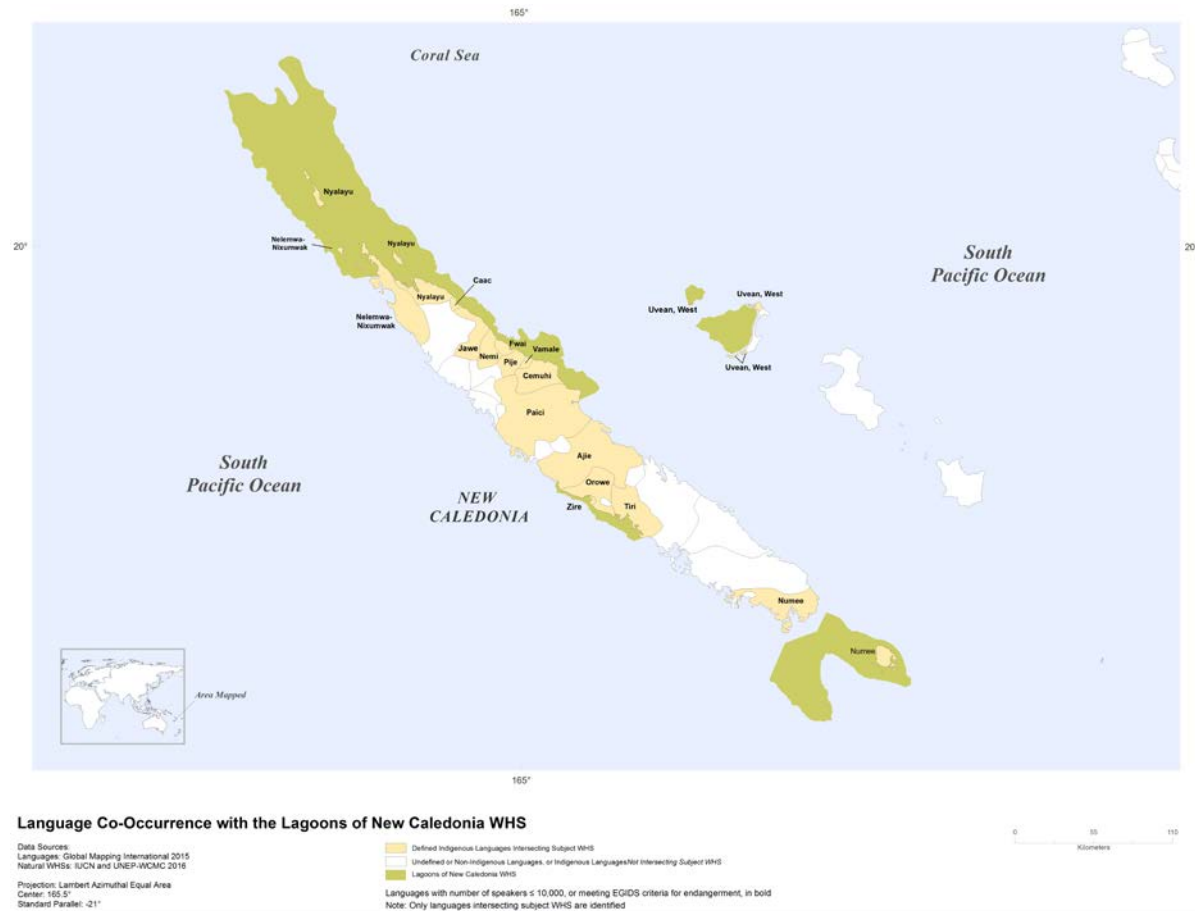

**Figure S3. Map of Indigenous Languages intersecting Lagoons of New Caledonia: Reef Diversity and Associated Ecosystems WHS]**

**Table S4. Indigenous Languages Intersecting Lagoons of New Caledonia: Reef Diversity and Associated Ecosystems WHS**

| Language         | EGIDS Assessment | Estimated Number of Speakers |
|------------------|------------------|------------------------------|
| Ajië             | 5                | 5,360                        |
| Caak             | 6b               | 1,170                        |
| Cemuhi           | 6b               | 2,600                        |
| Fagauvea         | 6b               | 2,220                        |
| Fwâi             | 6b               | 1,860                        |
| Jawe             | 6b               | 990                          |
| Nêlêmwa-Nixumwak | 6b               | 1,090                        |
| Nemi             | 6b               | 910                          |
| Numèè            | 6b               | 2,180                        |
| Nyelâyû          | 6b               | 1,960                        |
| Orowe            | 7                | 490                          |
| Paicî            | 5                | 7,250                        |
| Pije             | 8a               | 180                          |
| Tîrî             | 7                | 600                          |
| Vamale           | 8a               | 100                          |

Figure S4 presents a map showing languages that intersect the Lorentz National Park Natural WHS. Table S5 contains corresponding tabular data for those same languages.

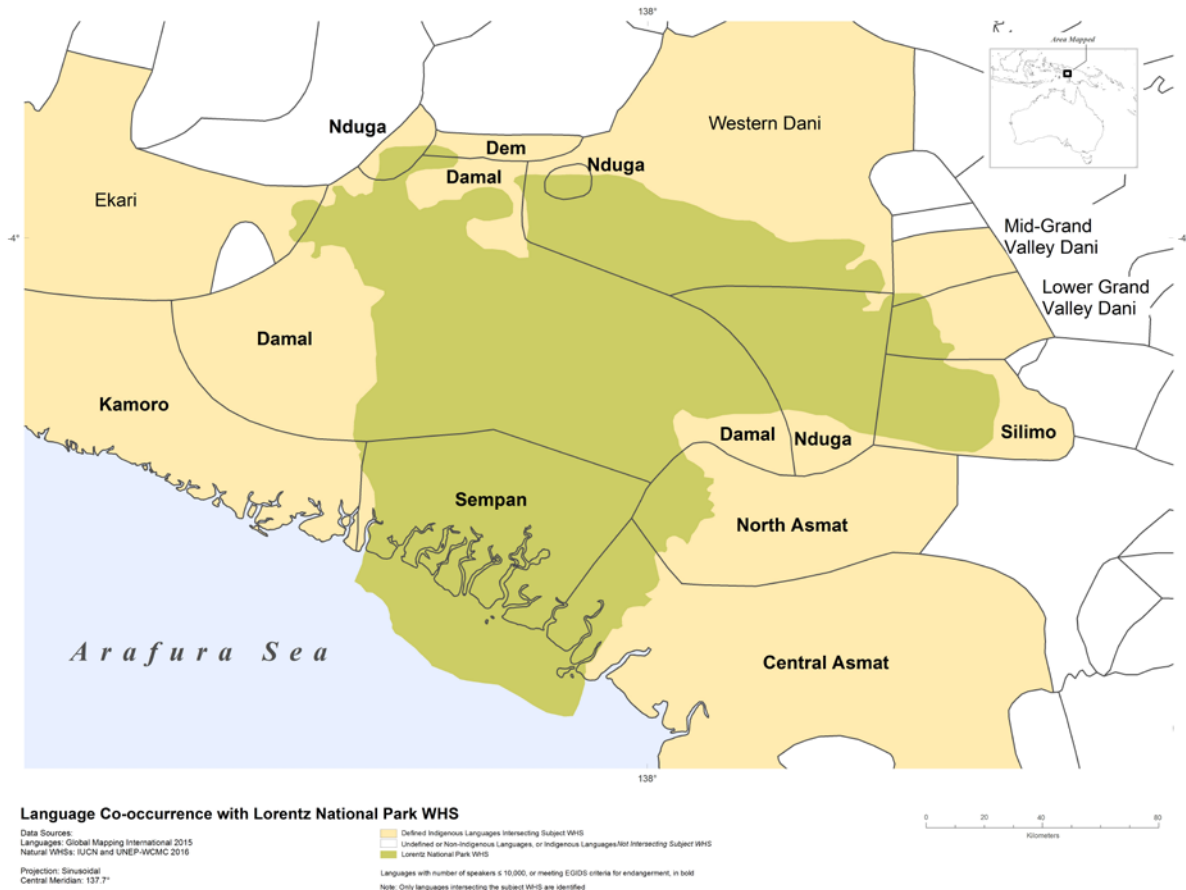

**Figure S4. Map of Indigenous Languages Intersecting Lorentz National Park WHS**

**Table S5. Indigenous Languages Intersecting Lorentz National Park WHS**

| <b>Language</b>         | <b>EGIDS Assessment</b> | <b>Estimated Number of Speakers</b> |
|-------------------------|-------------------------|-------------------------------------|
| Central Asmat           | 6b                      | 7,000                               |
| Damal                   | 6b                      | 14,000                              |
| Dem                     | 6a                      | 1,000                               |
| Ekari                   | 5                       | 100,000                             |
| Kamoro                  | 6a                      | 8,000                               |
| Lower Grand Valley Dani | 5                       | 20,000                              |
| Mid-Grand Valley Dani   | 5                       | 50,000                              |
| Nduga                   | 5                       | 10,000                              |
| North Asmat             | 6a                      | 1,000                               |
| Sempan                  | 6a                      | 1,000                               |
| Silimo                  | 5                       | 5,000                               |
| Western Dani            | 6a                      | 180,000                             |

Figure S5 presents a map showing languages that intersect the Selous Game Reserve Natural WHS. Table S6 contains corresponding tabular data for those same languages.

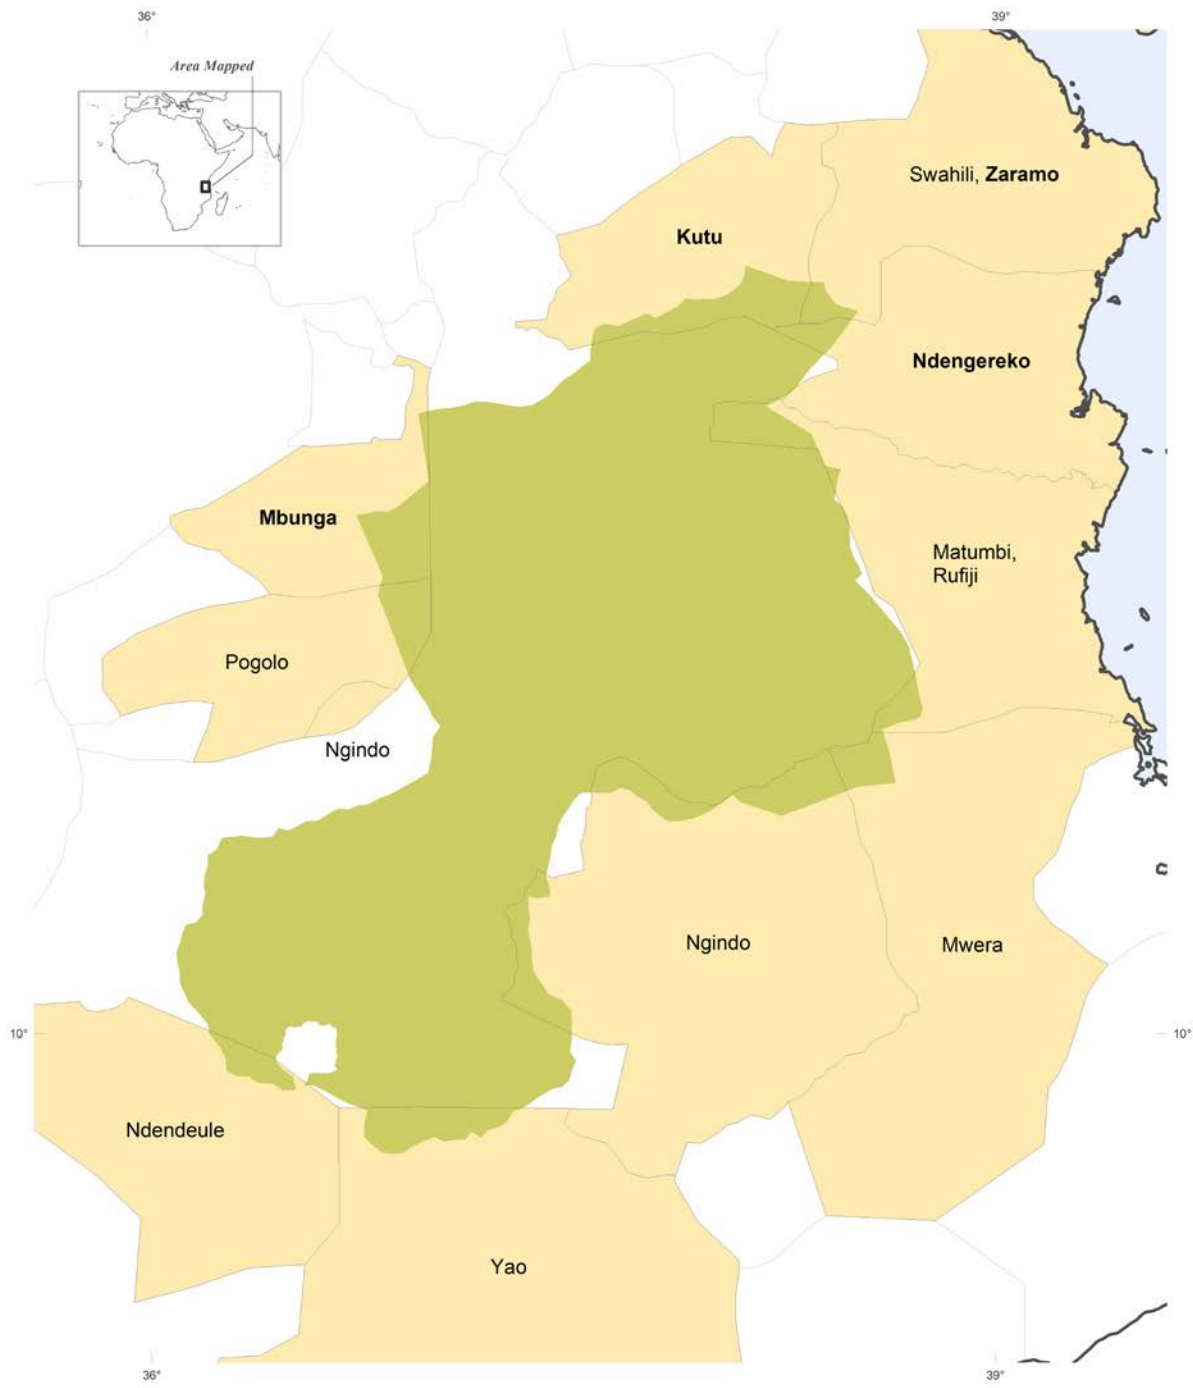

**Language Co-occurrence with Selous Game Reserve WHS**

Data Sources:  
 Languages: Global Mapping International 2015  
 Natural WHS: IUCN and UNEP-WCMC 2016

Defined Indigenous Languages Intersecting Subject WHS  
 Undefined or Non-Indigenous Languages, or Indigenous Languages Not Intersecting Subject WHS  
 Selous Game Reserve WHS  
 Languages with number of speakers ≤ 10,000, or meeting EGIDS criteria for endangerment, in bold  
 Note: Only languages intersecting subject WHS are identified

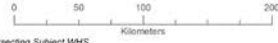

Projection: Sonusoidal  
 Central Meridian: 37.45°

**Figure S5. Map of Indigenous Languages Intersecting Selous Game Reserve WHS**

**Table S6. Indigenous Languages Intersecting Selous Game Reserve WHS**

| Language   | EGIDS Assessment | Estimated Number of Speakers |
|------------|------------------|------------------------------|
| Kutu       | 6b               | 45,000                       |
| Matumbi    | 6a               | 72,000                       |
| Mbunga     | 6b               | 29,000                       |
| Mwera      | 6a               | 469,000                      |
| Ndendeule  | 6a               | 100,000                      |
| Ndengereko | 6b               | 72,000                       |
| Ngindo     | 6a               | 220,000                      |
| Pogolo     | 6a               | 185,000                      |
| Rufiji     | 6a               | 200,000                      |
| Swahili    | 1                | 15,000,000                   |
| Yao        | 5                | 3,116,000                    |
| Zarama     | 8a               | -                            |

Figure S6 presents a map showing languages that intersect the Three Parallel Rivers of Yunnan Protected Areas Natural WHS. Table S7 contains corresponding tabular data for those same languages.

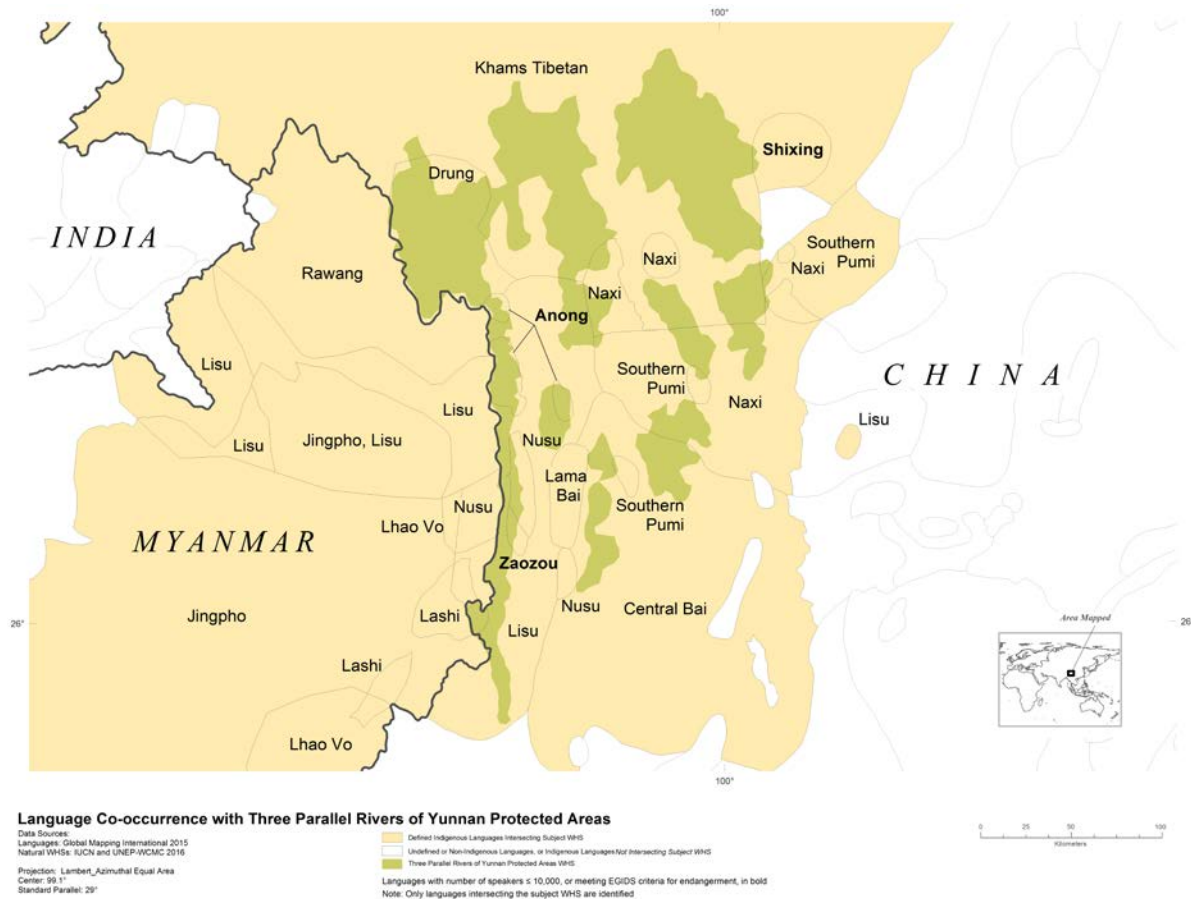

**Figure S6. Map of Indigenous Languages that Intersect Three Parallel Rivers of Yunnan Protected Areas WHS**



**Table S7. Indigenous Languages Intersecting Three Parallel Rivers of Yunnan Protected Areas WHS**

| Language      | EGIDS Assessment | Estimated Number of Speakers |
|---------------|------------------|------------------------------|
| Anong         | 8a               | 50                           |
| Central Bai   | 6a               | 800,000                      |
| Drung         | 6a               | 14,225                       |
| Jingpho       | 3                | 900,000                      |
| Khams Tibetan | 6a               | 1,380,300                    |
| Lama Bai      | 6a               | 60,000                       |
| Lashi         | 5                | 31,800                       |
| Lhao Vo       | 5                | 100,000                      |
| Lisu          | 3                | 900,000                      |
| Naxi          | 5                | 300,000                      |
| Nusu          | 6a               | 12,670                       |
| Rawang        | 3                | 62,000                       |
| Shixing       | 6b               | 1,800                        |
| Southern Pumi | 6a               | 19,000                       |
| Zauzou        | 6b               | 2,100                        |

Figure S7 presents a map showing languages that intersect the Tropical Rainforest Heritage of Sumatra Natural WHS. Table S8 contains corresponding tabular data for those same languages.

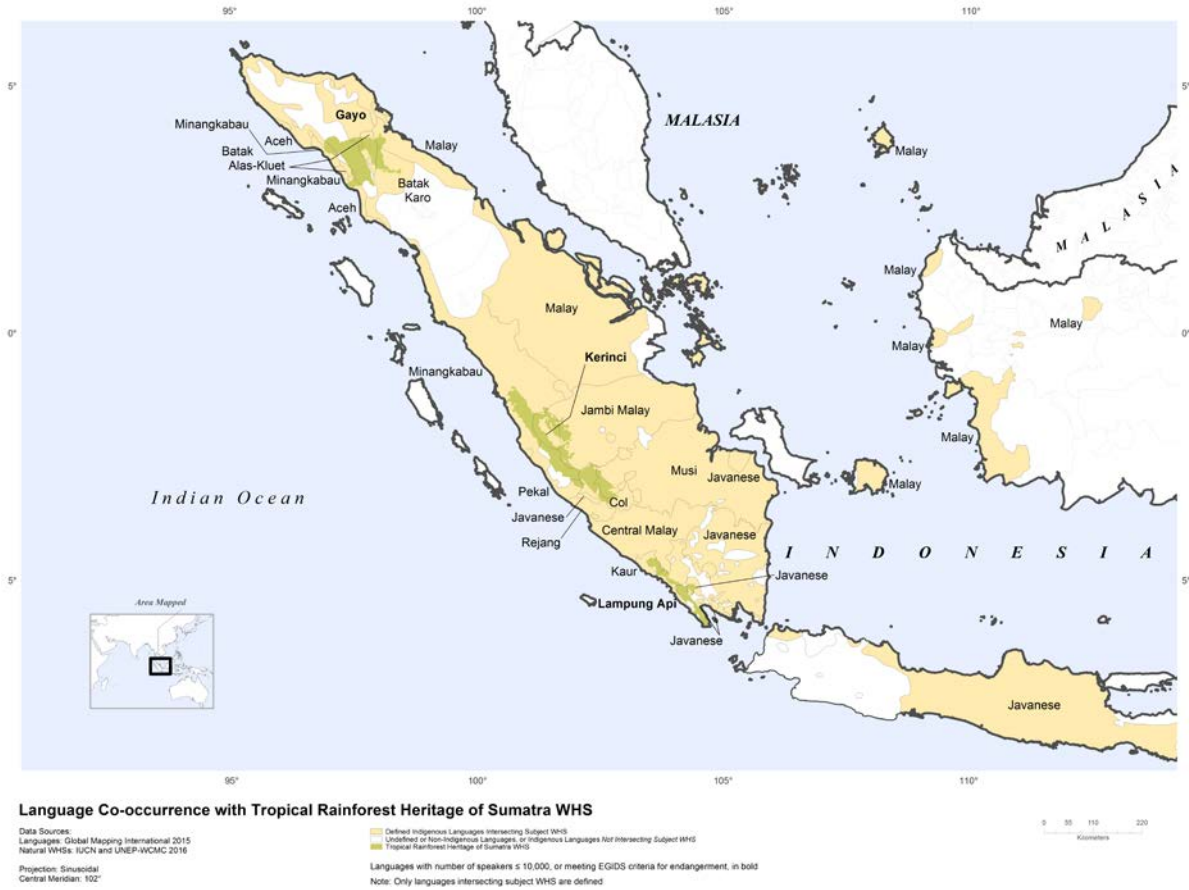

**Figure S7. Map of Indigenous Languages Intersecting Tropical Rainforest Heritage of Sumatra WHS**

**Table S8. Indigenous Languages Intersecting Tropical Rainforest Heritage of Sumatra WHS**

| Language         | EGIDS Assessment | Estimated Number of Speakers |
|------------------|------------------|------------------------------|
| Aceh             | 5                | 3,500,000                    |
| Batak Alas-Kluet | 6a               | 195,000                      |
| Batak Karo       | 5                | 600,000                      |
| Central Malay    | 6a               | 590,000                      |
| Col              | 6a               | 145,000                      |
| Gayo             | 6b               | 300,000                      |
| Jambi Malay      | 6a               | 1,000,000                    |
| Javanese         | 2                | 84,300,000                   |
| Kaur             | 6a               | 40,000                       |
| Kerinci          | 6b               | 260,000                      |
| Lampung Api      | 6b               | 827,000                      |
| Malay            | 6a               | 4,910,000                    |
| Minangkabau      | 5                | 5,530,000                    |
| Musi             | 3                | 3,105,000                    |
| Pekal            | 6a               | 30,000                       |
| Rejang           | 6a               | 350,000                      |

Figure S8 presents a map showing languages that intersect the Virunga National Park Natural WHS. Table S9 contains corresponding tabular data for those same languages.

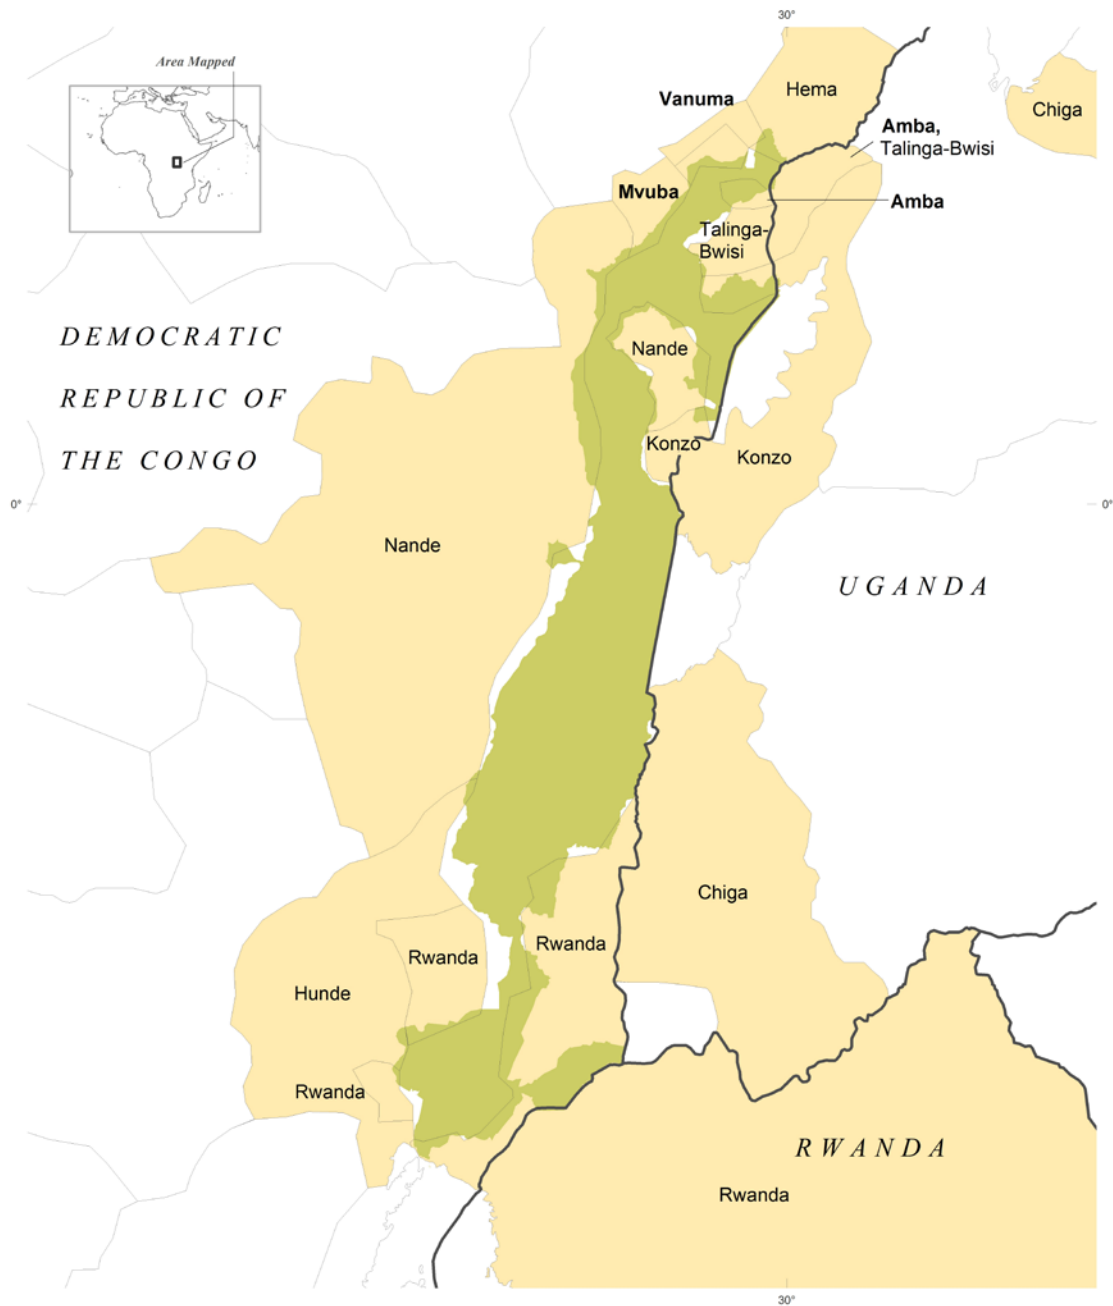

**Language Co-occurrence with Virunga National Park WHS**

Data Sources:  
 Languages: Global Mapping International 2015  
 Natural WHS: IUCN and UNEP-WCMC 2016

Defined Indigenous Languages Intersecting Subject WHS  
 Undefined or Non-Indigenous Languages, or Indigenous Languages Not Intersecting Subject WHS  
 Virunga National Park WHS

Languages with number of speakers  $\leq 10,000$ , or meeting EGIDS criteria for endangerment, in bold  
 Note: Only languages intersecting subject WHS are identified

Projection: Sonusoidal  
 Central Meridian: 29.35°

**Figure S8. Map of Indigenous Languages Intersecting Virunga National Park WHS**

**Table S9. Indigenous Languages Intersecting Virunga National Park WHS**

| Language      | EGIDS Assessment | Estimated Number of Speakers |
|---------------|------------------|------------------------------|
| Amba          | 6b               | 40,100                       |
| Chiga         | 4                | 1,580,000                    |
| Hema          | 6a               | 125,000                      |
| Hunde         | 6a               | 200,000                      |
| Konzo         | 5; 6a            | 609,000; 0                   |
| Mvuba         | 6b               | 5,100                        |
| Nande         | 5                | 903,000                      |
| Rwanda        | 1; 5             | 6,490,000; 25,000            |
| Talinga-Bwisi | 5; 6a            | 68,500; 30,900               |
| Vanuma        | 6a               | 6,700                        |

Figure S9 presents a map showing languages that intersect the Western Ghats Natural WHS. Table S10 contains corresponding tabular data for those same languages.

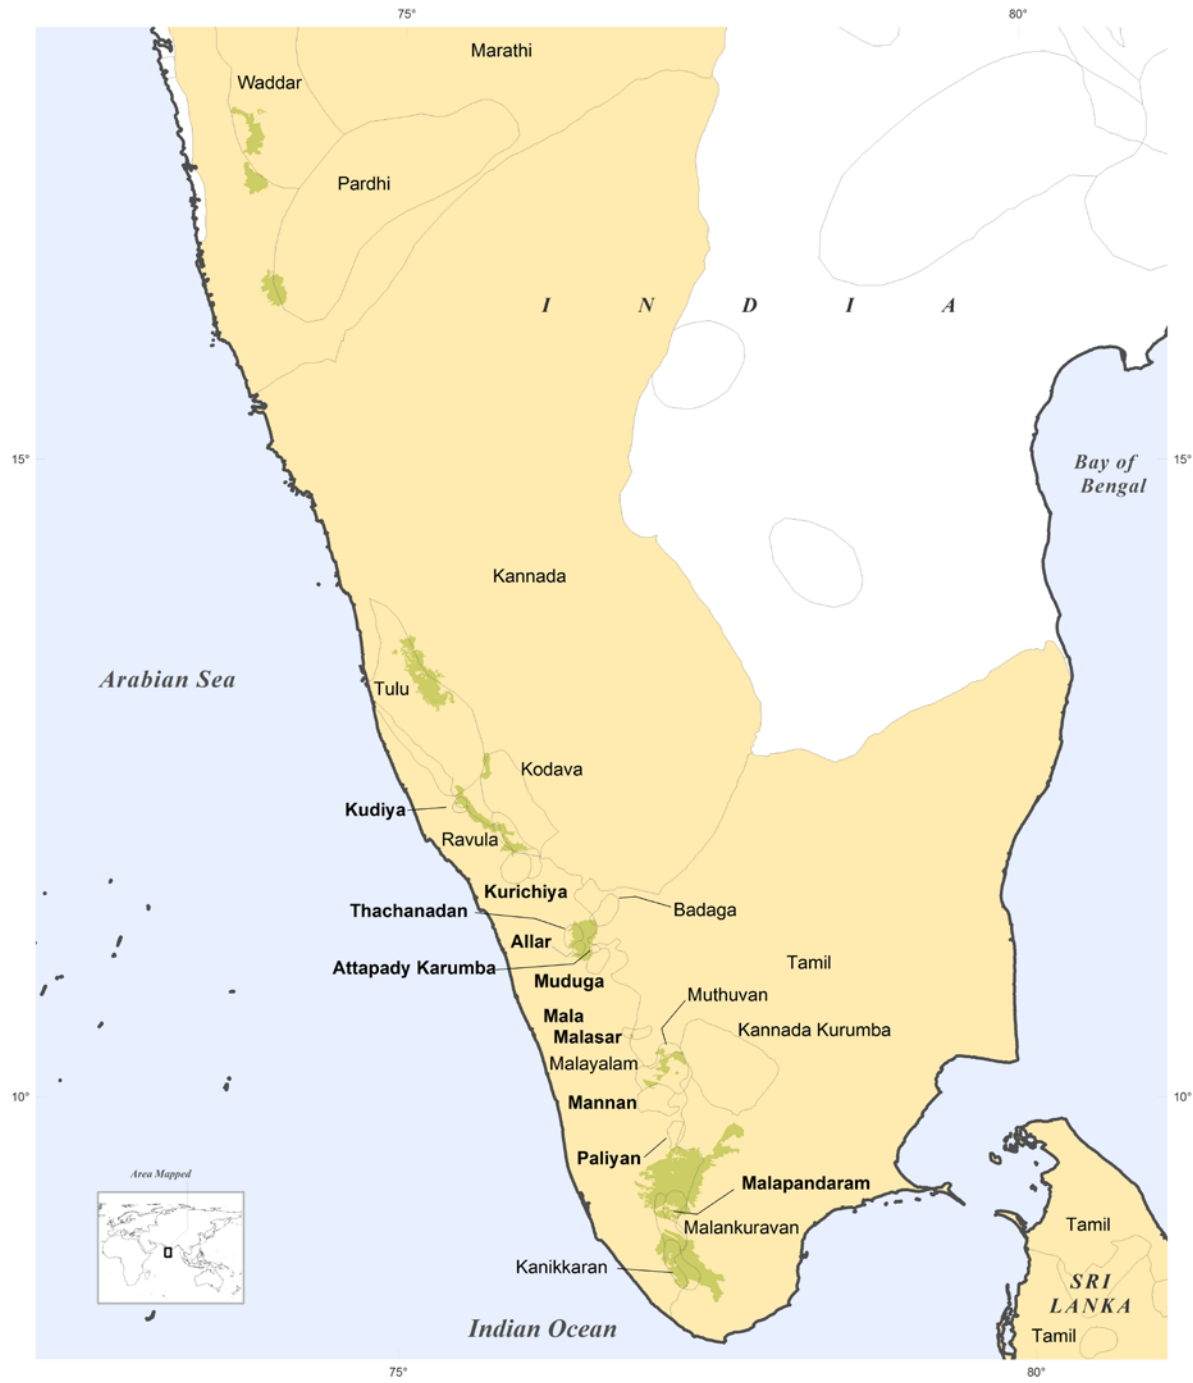

**Language Co-Occurrence with the Western Ghats Natural WHS**

Data Sources:  
 Languages: Global Mapping International 2015  
 Natural WHS: IUCN and UNEP-WCMC 2016  
 Projection: Sinusoidal  
 Central Meridian: 76.5°

Defined Indigenous Languages Intersecting Subject WHS  
 Undefined or Non-Indigenous Languages, or Indigenous Languages Not Intersecting Subject WHS  
 Western Ghats WHS  
 Languages with number of speakers  $\leq 10,000$ , or meeting EGIDS criteria for endangerment, in bold  
 Note: Only languages intersecting subject WHS are identified

**Figure S9. Map of Indigenous Languages Intersecting Western Ghats WHS**

**Table S10. Indigenous Languages Intersecting Western Ghats WHS**

| Language         | EGIDS Assessment | Estimated Number of Speakers |
|------------------|------------------|------------------------------|
| Allar            | 6b               | 350                          |
| Attapady Kurumba | 6a               | 1,370                        |
| Badaga           | 5                | 135,000                      |
| Kanikkaran       | 6a               | 19,000                       |
| Kannada          | 2                | 37,700,000                   |
| Kannada Kurumba  | 5                | 180,000                      |
| Kodava           | 5                | 200,000                      |
| Kudiya           | 6a               | 2,800                        |
| Kurichiya        | 6b               | 29,400                       |
| Mala Malasar     | 6a               | 1,000                        |
| Malankuravan     | 6a               | 18,600                       |
| Malapandaram     | 6a               | 5,850                        |
| Malayalam        | 2                | 33,000,000                   |
| Mannan           | 6b               | 7,850                        |
| Marathi          | 2                | 71,700,000                   |
| Muduga           | 6a               | 3,370                        |
| Muthuvan         | 6a               | 16,800                       |
| Paliyan          | 6a               | 9,520                        |
| Pardhi           | 6a               | 49,300                       |
| Ravula           | 5                | 26,900                       |
| Tamil            | 2                | 60,700,000                   |
| Thachanadan      | 6b               | 3,000                        |
| Tulu             | 5                | 1,720,000                    |
| Waddar           | 6a               | 172,000                      |

## References

Bermúdez, JF, Robertson K (2011) Conservation in countries with multiple crisis factors: The case of Los Katios National Natural Park, a world humanity heritage in danger. *Inventum* 11: 28-49

IUCN and United Nations Development Programme-World Conservation Monitoring Centre (UNEP-WCMC) (2016) The world database on protected areas (WDPA), July 2016. UNEP-WCMC, Cambridge, UK

Global Mapping International (2015) Global Mapping International, World language mapping system, Version 17. Global Mapping International, Colorado Springs, Colorado

Lewis MP, Simons GF, Fennig CD (2013) *Ethnologue: Languages of the world*. 17<sup>th</sup> edn. SIL International, Dallas, Texas

Mittermeier RA, Robles Gil P, Hoffmann M, Pilgrim J, Brooks T, Mittermeier CG, Lamoreux J, da Fonseca GAB (compilers) (2005) *Hotspots revisited*. CEMEX, Mexico City

Osipova, E, Shi Y, Kormos C, Shadie P, Zwahlen C, Badman T. (2014) *IUCN World Heritage outlook 2014: A conservation assessment of all natural World Heritage Sites*. IUCN, Gland, Switzerland

Suman D (2007) Globalization and the Pan-American Highway: Concerns for the Panama-Columbia border region of Darién-Chocó and its peoples. *University of Miami Inter-American Law Review* 38: 549-614

UNESCO (2015) IUCN Reactive Monitoring Mission Los Katíos National Park, Colombia (N 711). UNESCO, Paris. <http://whc.unesco.org/en/documents/135425/>. Accessed 3 June 2016

World Wide Fund for Nature-Colombia (2014) Landscape management in Chocó-Darién priority watersheds. WWF-Colombia, Bogotá
